# Supplementary material for: Association of Plasma Matrix Metalloproteinase and Tissue Inhibitors of Matrix Metalloproteinase Levels With Adverse Treatment Outcomes Among Patients With Pulmonary Tuberculosis
Source: PubMed Central journal article supplement (PMC7709089; doi:10.1001/jamanetworkopen.2020.27754), 2020-12-01
Supplement: jamanetwopen-e2027754-s001.pdf [file jamanetwopen-e2027754-s001.pdf]

## Supplementary Online Content

Kumar NP, Moideen K, Nancy A, et al. Association of plasma matrix metalloproteinase and tissue inhibitors of matrix metalloproteinase levels with adverse treatment outcomes among patients with pulmonary tuberculosis. *JAMA Netw Open*. 2020;3(12):e2027754. doi:10.1001/jamanetworkopen.2020.27754

**eFigure 1.** Elevated Baseline Plasma Levels of MMPs and TIMPs in Cases in the Test and Validation Cohorts

**eFigure 2.** Receiver Operating Characteristic Analysis to Estimate the Discriminatory Power of Systemic MMPs and TIMPs With Bad Outcomes and Control

**eTable.** Demographic and Clinical Characteristics of the Study Population—Validation Cohort

This supplementary material has been provided by the authors to give readers additional information about their work.

# eFigure 1. Elevated Baseline Plasma Levels of MMPs and TIMPs in Cases in the Test and Validation Cohorts

## A. Test Cohort

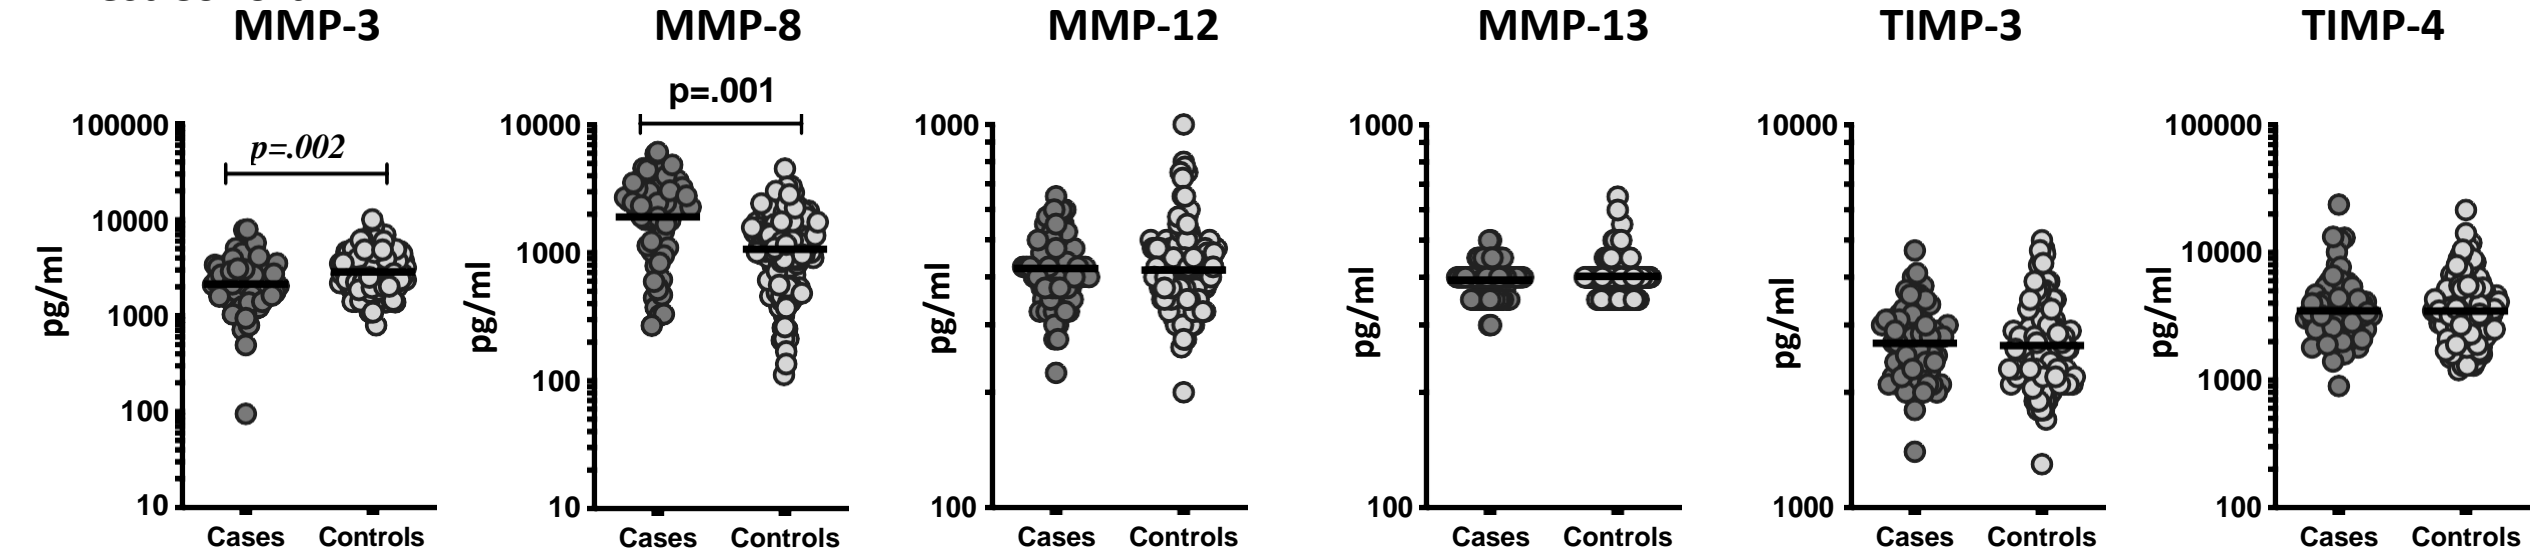

## B. Validation Cohort

## B. Validation Cohort

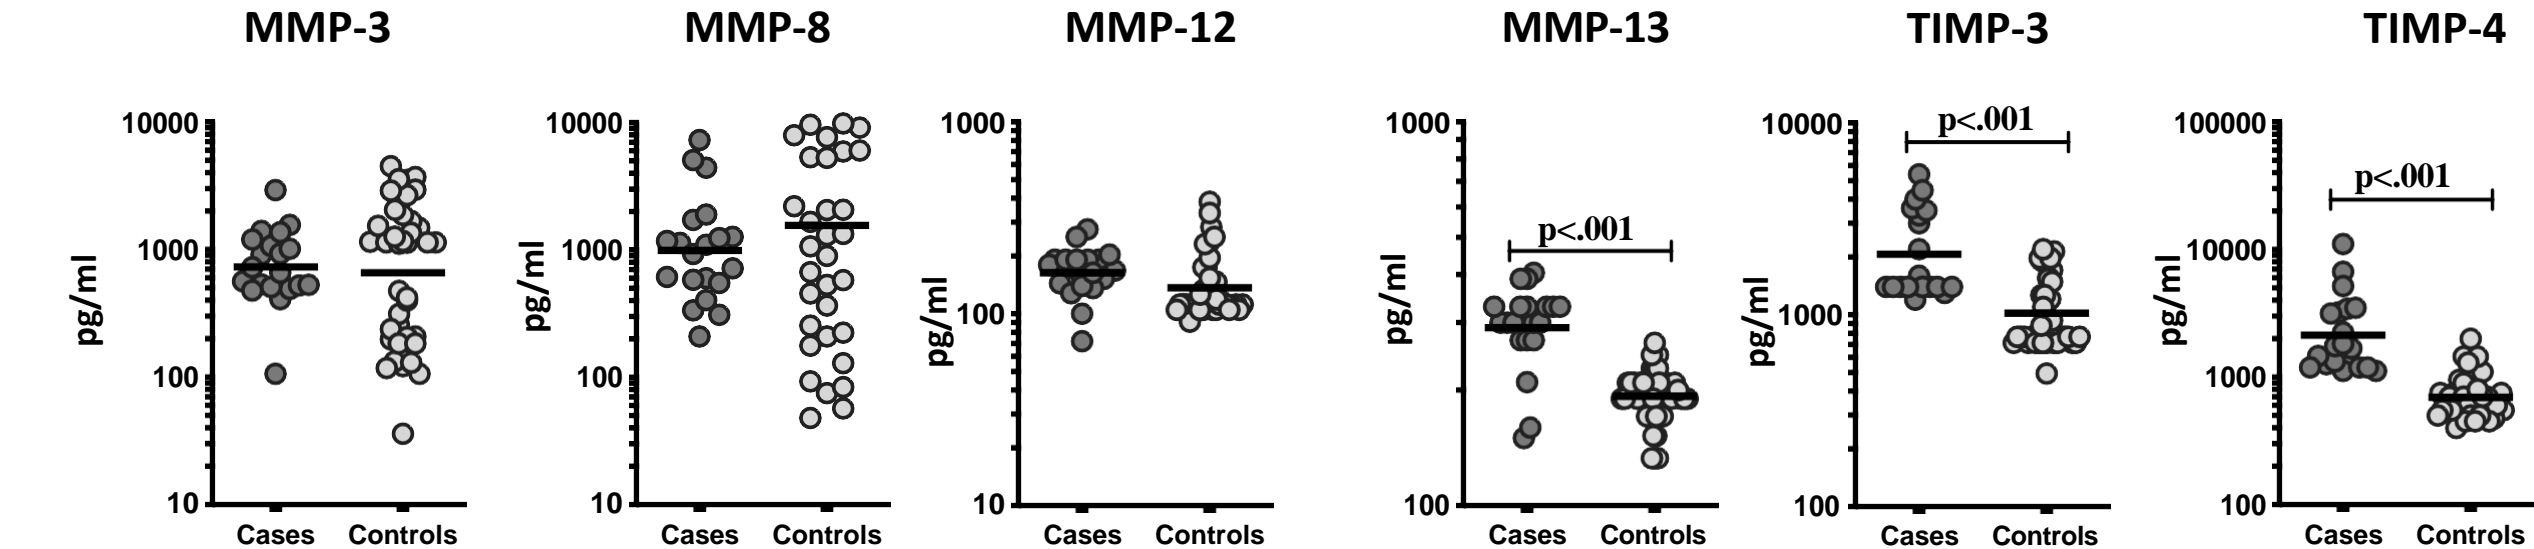

Figure 2. Receiver Operating Characteristic Analysis to Estimate the Discriminatory Power of Systemic MMPs and TIMPs With Bad Outcomes and Control

**A. Relapse Cases vs Controls**

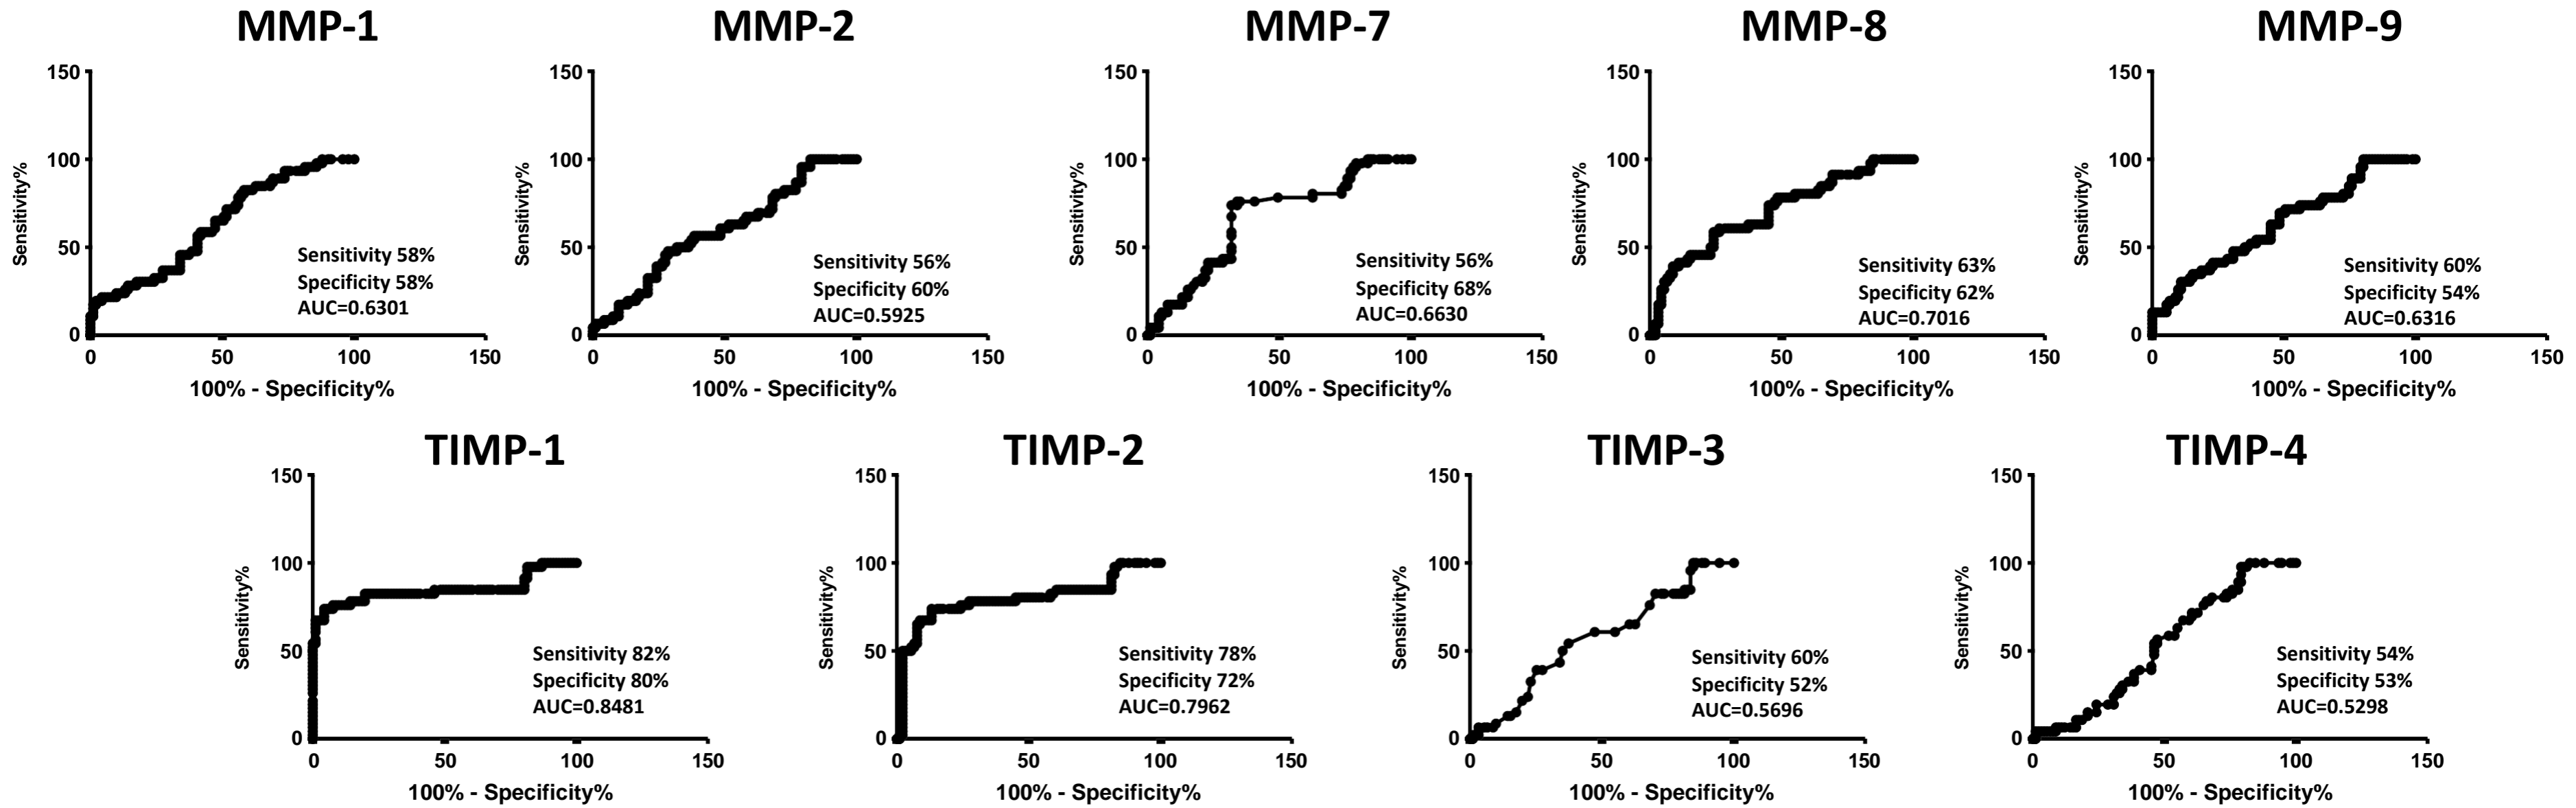

**B. Treatment Failure Cases vs Controls**

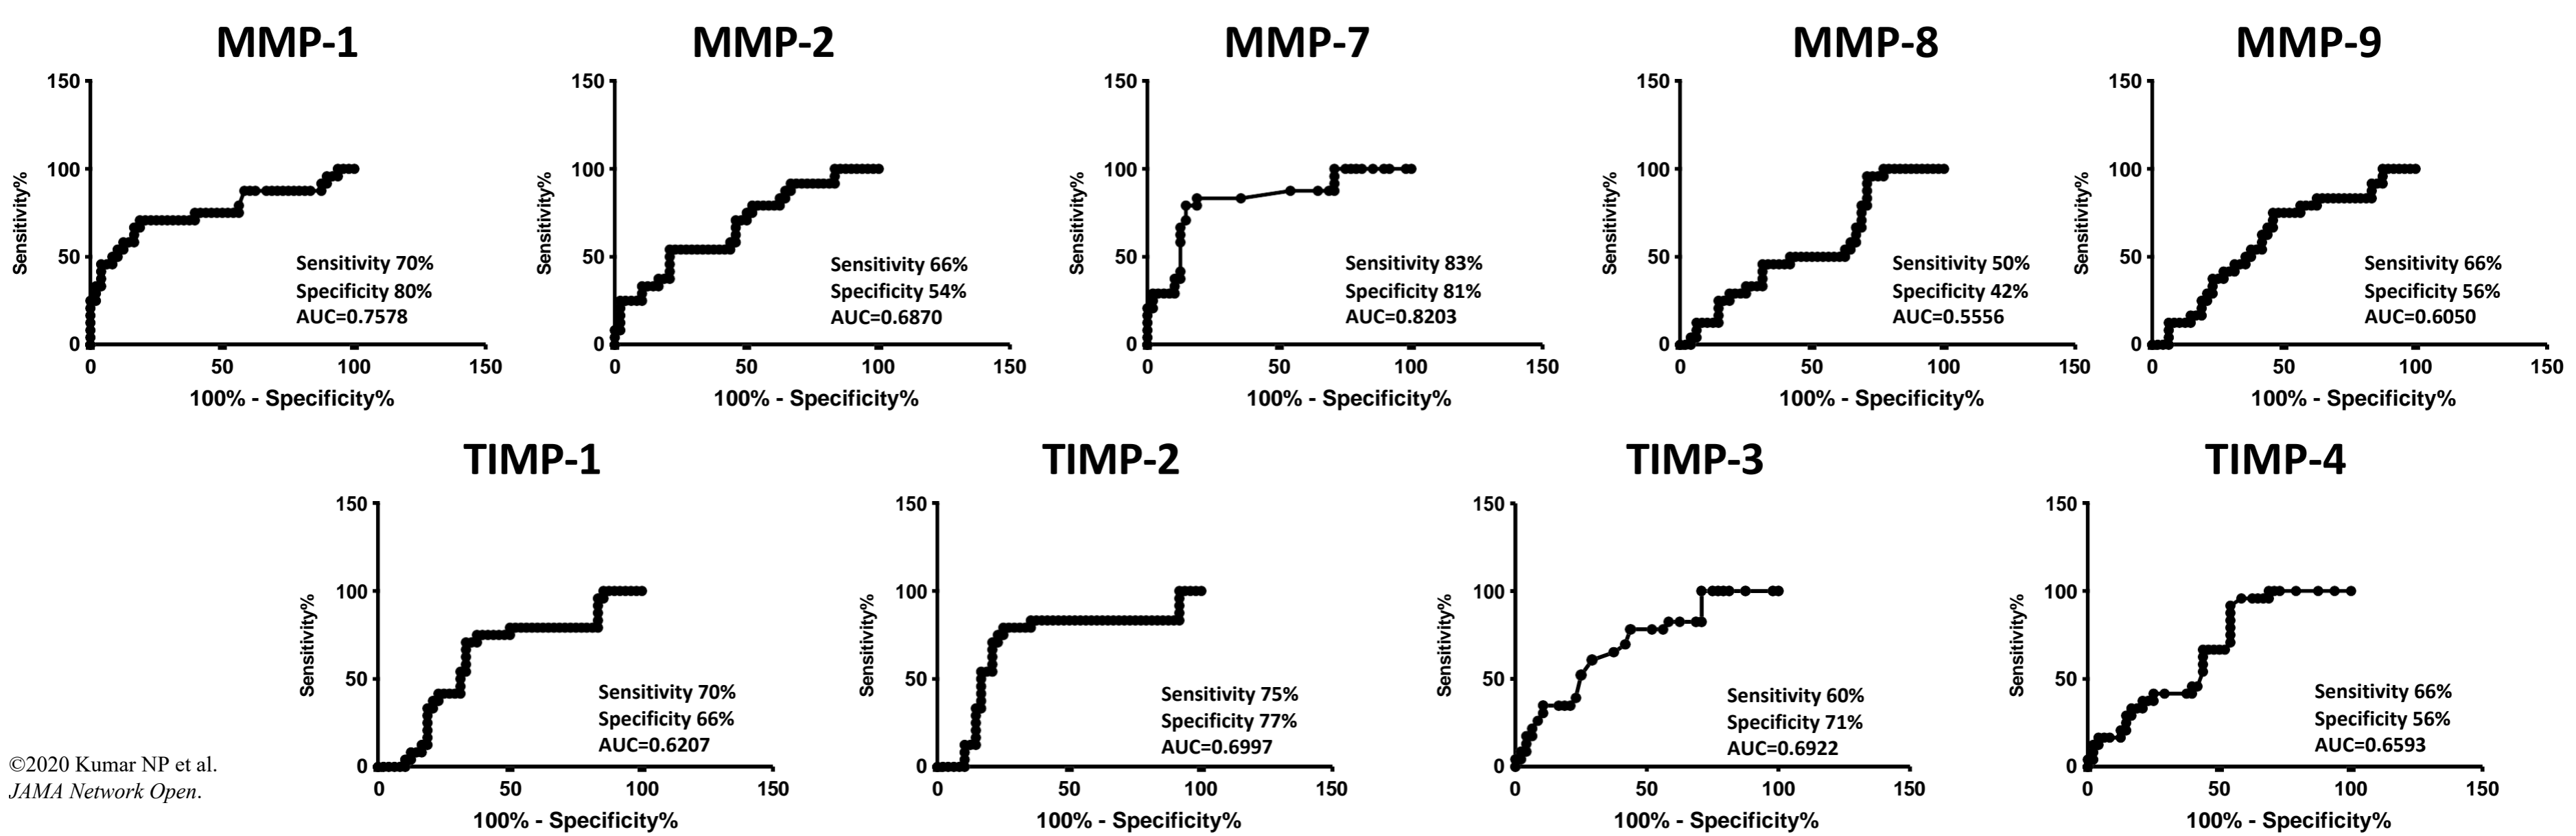

**eTable. Demographic and clinical characteristics of the study population – Validation cohort**

| <b>Characteristic</b> | <b>All (n=60)</b> | <b>Cases<br/>(n=20 [34%])</b> | <b>Controls<br/>(n=40 [66%])</b> | <b>P Value</b> |
|-----------------------|-------------------|-------------------------------|----------------------------------|----------------|
| Age, y, median        | 45 (19 – 61)      | 45 (20 - 48)                  | 40 (19 - 61)                     | 0.1297         |
| <b>Gender</b>         |                   |                               |                                  |                |
| Male                  | 51 [85%]          | 19 [95%]                      | 32 [80%]                         | 0.1250         |
| Female                | 9 [15%]           | 1 [5%]                        | 8 [20%]                          |                |
| <b>Cavity</b>         |                   |                               |                                  |                |
| Yes                   | 27 [45%]          | 10 [50%]                      | 17 [43%]                         | 0.5820         |
| No                    | 33 [55%]          | 10 [50%]                      | 23 [57%]                         |                |
| <b>Smear Grade</b>    |                   |                               |                                  |                |
| 1+                    | 22 [36%]          | 7 [35%]                       | 15 [38%]                         | 0.9743         |
| 2+                    | 21 [35%]          | 7 [35%]                       | 14 [35%]                         |                |
| 3+                    | 17 [29%]          | 6 [30%]                       | 11 [27%]                         |                |
| <b>Culture Grade</b>  |                   |                               |                                  |                |
| 1+                    | 20 [33%]          | 7 [35%]                       | 13 [33%]                         | 0.9277         |
| 2+                    | 20 [33%]          | 7 [35%]                       | 13 [33%]                         |                |
| 3+                    | 20 [33%]          | 6 [30%]                       | 14 [34%]                         |                |
